# Supplementary material
Source: HighWire-hosted journal article supplement (https://cmaj.ca/highwire/filestream/58852/field_highwire_adjunct_files/0/home-kerry-1-at.pdf)
Supplement: home-kerry-1-at.pdf [file home-kerry-1-at.pdf]

**Appendix 1: Baseline characteristics of randomized patients who were and were not followed up at 12 months (as supplied by the authors)**

|                                                   | Not followed up<br>(n=44) | Followed up<br>(n=337) | P value            |
|---------------------------------------------------|---------------------------|------------------------|--------------------|
| Age                                               | 73 (13.7)                 | 72 (11.9)              | 0.52               |
| Male gender                                       | 26 (59%)                  | 193 (57%)              | 0.82               |
| Ethnicity                                         |                           |                        |                    |
| White                                             | 31 (70%)                  | 260 (77%)              |                    |
| Black                                             | 8 (18%)                   | 41 (12%)               |                    |
| Other                                             | 5 (12%)                   | 36 (11%)               | 0.51 <sup>+</sup>  |
| IMD score 2007 <sup>†</sup>                       | 18.4 (12.6)               | 18.4 (10.4)            | 0.99               |
| Rankin score                                      |                           |                        |                    |
| 0 No symptoms                                     | 10 (23%)                  | 97 (29%)               |                    |
| 1 Minor symptoms which don't affect activities    | 15 (34%)                  | 89 (26%)               |                    |
| 2 Unable to do all previous activities            | 12 (27%)                  | 91 (27%)               |                    |
| 3+ Need help with selfcare                        | 7 (16%)                   | 60(18%)                | 0.88 <sup>++</sup> |
| Abbreviated Mental Test Score 10/10 <sup>**</sup> | 33 (77%)                  | 293 (88%)              | 0.035              |
| Anxious (FEAR questionnaire) (n=376)              | 7 (16%)                   | 60 (18%)               | 0.72               |
| Event prior to recruitment (n=336)                | n=22                      | n=316                  |                    |
| TIA                                               | 6 (27%)                   | 102 (32%)              | 0.80 <sup>+</sup>  |
| Ischaemic stroke                                  | 15 (68%)                  | 190 (60%)              |                    |
| Haemorrhagic stroke                               | 1 (5%)                    | 19 (6%)                |                    |
| Both or type unknown                              | 0(0)                      | 5(2%)                  |                    |
| Blood pressure                                    |                           |                        |                    |
| Systolic mmHg                                     | 137 (24.3)                | 138 (20.7)             | 0.78               |
| Diastolic mmHg                                    | 74 (16.4)                 | 74 (11.1)              | 0.98               |
| Body mass index (n=331)                           | 27.3 (6.3)                | 27.7 (5.2)             | 0.63               |
| Current smoker (n=379)                            | 8 (18%)                   | 38 (11%)               | 0.25               |
| Patient reported past history of                  |                           |                        |                    |
| Diabetes                                          | 12 (27%)                  | 71 (21%)               | 0.35               |
| Atrial Fibrillation                               | 11 (25%)                  | 72 (21%)               | 0.55               |
| Stroke or TIA (prior to presenting event)         | 12 (27%)                  | 103 (31%)              | 0.66               |
| Angina or heart attack                            | 7 (16%)                   | 69 (20%)               | 0.51               |
| Number of antihypertensive drugs                  | 1.9 (1.1)                 | 1.8 (1.1)              | 0.36               |

Data are mean(SD) or number (%)

<sup>†</sup> Index of multiple deprivation (IMD) 2007 scale ranges from 0.37 to 85.46.

<sup>\*\*</sup> n=43 and n=332 as some patients had speech problems. Comprehension good and inclusion approved by clinic doctor.

<sup>\*\*\*</sup> n=43 and n=332

<sup>\*\*\*\*</sup> n=22 and n=313, 46 participants stroke type unknown

<sup>\*\*\*\*\*</sup> n=39 and n=292 as some patients too frail for measurement

<sup>+</sup> Chisquare with 2 d.f.

<sup>++</sup> Chisquare for trend
